# Supplementary material for: Repurposing the anthelmintic drug niclosamide to combat Helicobacter pylori
Source: PubMed Central journal article supplement (PMC5829259; doi:10.1038/s41598-018-22037-x), 2018-02-27
Supplement: 41598_2018_22037_MOESM1_ESM.pdf [file 41598_2018_22037_MOESM1_ESM.pdf]

# Repurposing the anthelmintic drug niclosamide to combat

## *Helicobacter pylori*

Nagendran Tharmalingam<sup>1</sup>, Jenna Port<sup>1</sup>, Dawilmer Castillo<sup>1</sup>, Eleftherios Mylonakis<sup>1, \*</sup>

<sup>1</sup>Infectious Diseases Division, Warren Alpert Medical School of Brown University, Rhode Island Hospital, Providence, RI, 02903, USA.

**\*Corresponding author:** Eleftherios Mylonakis, M.D., Ph.D., FIDSA,

Rhode Island Hospital

593 Eddy Street, POB, 3<sup>rd</sup> Floor, Suite 328/330

Providence, RI, 02903

Tel: 401-444-7856

Fax: 401-444-8179

Email: [emylonakis@lifespan.org](mailto:emylonakis@lifespan.org)

**Supplementary Table S1. List of Primers**

| <b>Primer</b>                       | <b>Relevant sequence</b>             | <b>Size</b> | <b>Amplification<br/>cycles</b> | <b>Annealing<br/>temperature</b> | <b>References</b> |
|-------------------------------------|--------------------------------------|-------------|---------------------------------|----------------------------------|-------------------|
| <b><i>vacA-F</i></b>                | 5' AAACGACAAGAAGAGATCAGT 3'          | 291         | 20                              | 58                               | 51,63             |
| <b><i>vacA-R</i></b>                | 3' CCAGCAAAAGGCCCATCAA 5'            |             |                                 |                                  |                   |
| <b><i>galE-F</i></b>                | 5' ATGGCATTATTATTCACAGG 3'           | 461         | 20                              | 58                               | 51                |
| <b><i>galE-R</i></b>                | 3' GCTCCATAAGGATTAATGGG 5'           |             |                                 |                                  |                   |
| <b><i>Real-Time PCR Primers</i></b> |                                      |             |                                 |                                  |                   |
| <b>IL 8- F</b>                      | 5'-ACT GAG AGT GAT TGA GAG TGG AC-3' |             | 40                              |                                  | 64                |
| <b>IL 8-R</b>                       | 5'-AAC CCT CTG CAC CCA GTT TTC-3'    |             |                                 |                                  |                   |
| <b>18 rRNA-F</b>                    | 5'-CGG CGA CGA CCC ATT CGA AC-3'     |             | 40                              |                                  | 64                |
| <b>18s rRNA-R</b>                   | 5'-GAA TCG AAC CCT GAT TCC CCG TC-3' |             |                                 |                                  |                   |

**Supplementary Table S2. Pilot screening of hit compounds from MRSA and *F. tularensis* LVS screen for the anti-*H. pylori* activity.**

| Antibacterials (Hit molecules from MRSA and <i>F. tularensis</i> LVS screen) | MIC | Structure                                                                             |
|------------------------------------------------------------------------------|-----|---------------------------------------------------------------------------------------|
| 1                                                                            | 1   | 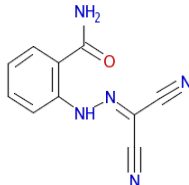   |
| 2                                                                            | 1   |    |
| 3                                                                            | 1   |   |
| 4                                                                            | 2   |  |
| 5                                                                            | 4   |  |
| 6                                                                            | 4   |  |
| 7                                                                            | 8   |  |
| 8                                                                            | 16  |  |
| 9                                                                            | 16  |  |

|            |    |                                                                                       |
|------------|----|---------------------------------------------------------------------------------------|
| 10         | 32 | 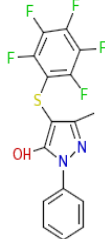   |
| 11         | 32 |    |
| 12         | 64 |    |
| Apramycin  | 2  |    |
| Mefloquine | 8  |   |
| Paroxetine | 16 |  |
| Diflunisal | 32 |  |

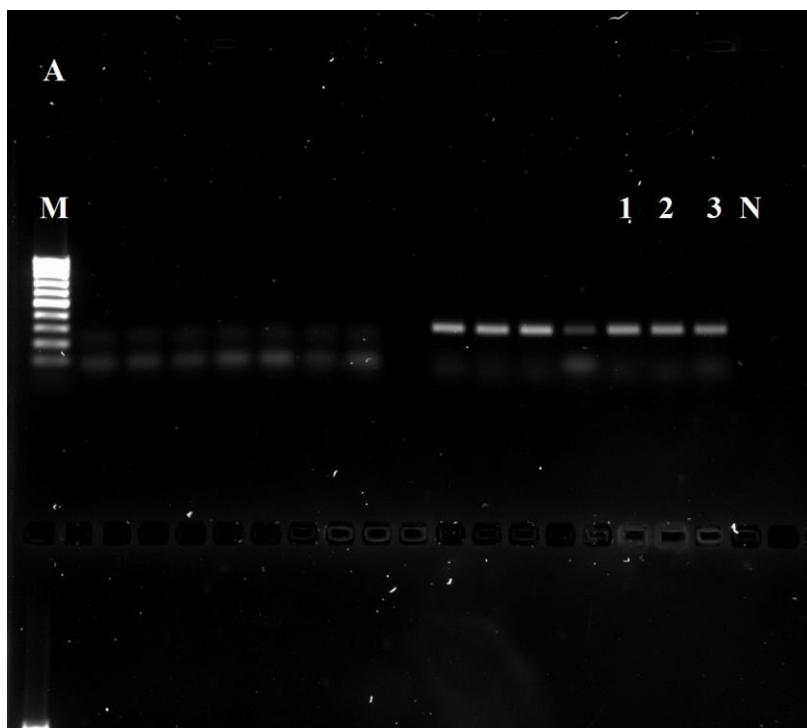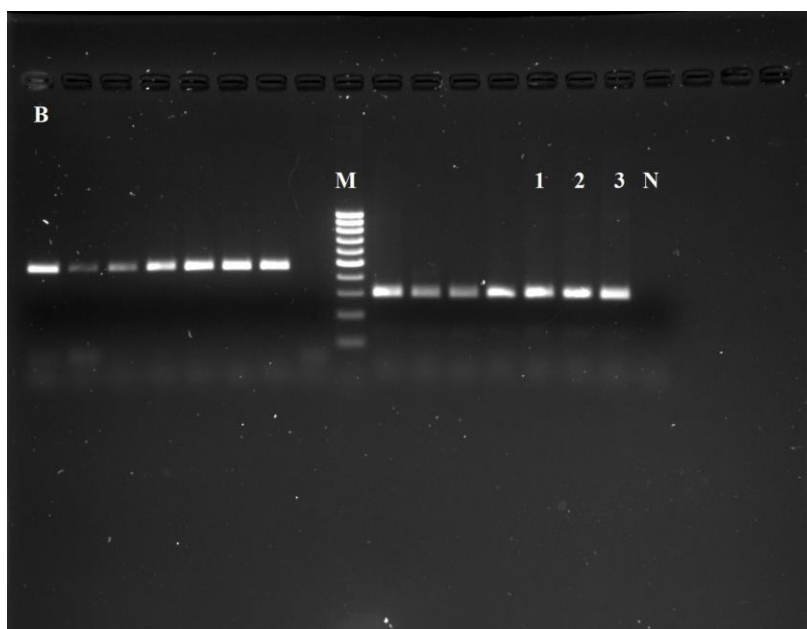

**Supplementary Figure S3. Uncropped full-length gel picture. S3 A.** Niclosamide down-regulated *vacA* gene (291 bp) expression at sub-MIC (0.2 µg/mL). M – Marker, 1. DMSO; 2. Niclosamide- 150 µg/mL; 3. Niclosamide- 200 µg/mL; N. Negative control. **S3 B.** Normalization of house-keeping gene *rpoB* (301 bp) in niclosamide treatment. M – Marker, 1. DMSO; 2. Niclosamide- 150 µg/mL; 3. Niclosamide- 200 µg/mL; N. Negative control.

- 51 Tharmalingam, N. *et al.* Piperine treatment suppresses Helicobacter pylori toxin entry in to gastric epithelium and minimizes  $\beta$ -catenin mediated oncogenesis and IL-8 secretion in vitro. *American journal of translational research* **8**, 885 (2016).
- 63 Boonjakuakul, J. K., Canfield, D. R. & Solnick, J. V. Comparison of Helicobacter pylori virulence gene expression in vitro and in the Rhesus macaque. *Infection and immunity* **73**, 4895-4904 (2005).
- 64 Tsai, K.-W. *et al.* Difference in the regulation of IL-8 expression induced by uropathogenic E. coli between two kinds of urinary tract epithelial cells. *Journal of biomedical science* **16**, 91 (2009).
